# Supplementary material
Source: PubMed Central journal article supplement (PMC10350463)
Supplement: NIHMS1854799-supplement-Supplemental_Data_File___doc___tif__pdf__etc___2.pdf [file NIHMS1854799-supplement-Supplemental_Data_File___doc___tif__pdf__etc___2.pdf]

### Codebook

| Code                                                      | Code Definition                                                                                                                                                                                                                                                                                                                                                                                                         | Code group 1 | Code group 2       |
|-----------------------------------------------------------|-------------------------------------------------------------------------------------------------------------------------------------------------------------------------------------------------------------------------------------------------------------------------------------------------------------------------------------------------------------------------------------------------------------------------|--------------|--------------------|
| <b>Data is abundant</b>                                   | Use this code for statements indicating or implying the sufficiency or abundance of data available, regardless of whether it is directly accessible to the participant.                                                                                                                                                                                                                                                 | Data Codes   | Benefits of access |
| <b>Planning and/or decision-making</b>                    | Use this code when the participant talks about using data to help with planning and/or decision-making for any reason related to staffing.                                                                                                                                                                                                                                                                              | Data Codes   | Benefits of access |
| <b>Organizational learning</b>                            | Use this code for statements related to viewing and comparing the same type of data between one entity and another within a particular VHA institution or across the VHA system, at any level, for the participant's own knowledge, or when the participant talks about sharing data with other entities at any level within a given facility or across the VA system to improve quality of care or processes for care. | Data Codes   | Benefits of access |
| <b>Data not current</b>                                   | Use this code for any statements indicating or implying that the desired data is not recent or updated frequently enough to meet the participant's needs at a given point in time.                                                                                                                                                                                                                                      | Data Codes   | Challenges         |
| <b>Data not specific to user need</b>                     | Use this code when the participant expresses that the data they are able to access does not meet their specific needs or is not relevant to their responsibilities.                                                                                                                                                                                                                                                     | Data Codes   | Challenges         |
| <b>Data/information not available to user's knowledge</b> | Use this code for statements indicating that to the participant's knowledge, a particular type of data, data source, or access to the data is not currently available at the VA.                                                                                                                                                                                                                                        | Data Codes   | Challenges         |
| <b>Fragmentation</b>                                      | Use this code when the participant talks about or implies having to go to numerous sources in order to get the data                                                                                                                                                                                                                                                                                                     | Data Codes   | Challenges         |

|                                                |                                                                                                                                                                                                                                                                                                                                                                                                                                         |                |            |
|------------------------------------------------|-----------------------------------------------------------------------------------------------------------------------------------------------------------------------------------------------------------------------------------------------------------------------------------------------------------------------------------------------------------------------------------------------------------------------------------------|----------------|------------|
|                                                | they need, mismatches in values between sources, or any mention of 'fragmentation' in some form.                                                                                                                                                                                                                                                                                                                                        |                |            |
| <b>In/efficiency of access to data</b>         | Use this code when the participant alludes to or mentions the need to take several specific steps in order to access the desired data, which includes waiting to receive data, and manually populating one's own database with the desired data, whether retrieved from the system or collected by oneself. Be sure to include any statements that may further describe challenges associated with manual data collection and/or entry. | Data Codes     | Challenges |
| <b>Inaccurate data</b>                         | Use this code when the participant alludes to or makes statements related to data inaccuracy for any reason, including statements which describe the data as not yet verified to be inaccurate but are either in the process of verification or raise questions as potentially being inaccurate from the perspective of the participant or others.                                                                                      | Data Codes     | Challenges |
| <b>Insufficient permissions to access data</b> | Use this code when the participant talks about or alludes to inability to access data as a result of having no sufficiently justifiable reason to receive access to the specified data, as determined by VA data security.                                                                                                                                                                                                              | Data Codes     | Challenges |
| <b>Lack of knowledge about available data</b>  | This code should describe instances in which the participant discusses not being knowledgeable about all of the data available to them, describes the overabundance of data as a challenge, and/or expresses that they are aware of the data but do not know how to access or use it.                                                                                                                                                   | Data Codes     | Challenges |
| <b>Limited access privileges</b>               | Use this code when the participant talks about having limited access or capability to view certain data.                                                                                                                                                                                                                                                                                                                                | Data Codes     | Challenges |
| <b>Multiple roles per staff</b>                | Use this code when the participant alludes to their staff taking on more than one type of role or are members of more than                                                                                                                                                                                                                                                                                                              | Staffing Codes | Challenges |

|                                    |                                                                                                                                                                                                                                                                                                                                                                                                                                                                                     |                |                   |
|------------------------------------|-------------------------------------------------------------------------------------------------------------------------------------------------------------------------------------------------------------------------------------------------------------------------------------------------------------------------------------------------------------------------------------------------------------------------------------------------------------------------------------|----------------|-------------------|
|                                    | one team, either of which require their immediate availability when necessary.                                                                                                                                                                                                                                                                                                                                                                                                      |                |                   |
| <b>Short staffing</b>              | Use this code when the participant alludes to having not enough staff at a specific point in time or over a given period of time.                                                                                                                                                                                                                                                                                                                                                   | Staffing Codes | Challenges        |
| <b>Accountability</b>              | Use this code when the participant talks about auditing or implies using data to assess compliance with organizational, local, state, or national standards or guidelines, follow up on observed metrics with other leaders, or to report status or performance to oversight bodies or system management.                                                                                                                                                                           | Data Codes     | Purpose of access |
| <b>Assess staff engagement</b>     | Use this code when the participant talks about using data to assess satisfaction and concerns of staff at any level, responses to satisfaction scores and staff concerns, efforts to minimize environmental and/or physical risk through implementation of measures (i.e. actions) or training, potential consequences of staff exposure to the specified risk(s), or any mention of 'staff engagement' in some form; Use also for any use of data to review retention or turnover. | Data Codes     | Purpose of access |
| <b>Determine patient acuity</b>    | Use this code for statements related to or which imply using data to assess severity or complexity of patient condition(s) or illness(es).                                                                                                                                                                                                                                                                                                                                          | Data Codes     | Purpose of access |
| <b>Informed workforce</b>          | Use this code when the participant talks about or implies sharing data with staff or other leaders at any level to facilitate monitoring adherence to standards or progress toward goals.                                                                                                                                                                                                                                                                                           | Data Codes     | Purpose of access |
| <b>Justification to leadership</b> | Use this code when the participant talks about or implies using data to justify additional resources or obtain leadership approval for a proposal or decision.                                                                                                                                                                                                                                                                                                                      | Data Codes     | Purpose of access |

|                                              |                                                                                                                                                                                                                                                                                                                                                                                                                                                                                                                                                                                                                                                                                                                               |            |                   |
|----------------------------------------------|-------------------------------------------------------------------------------------------------------------------------------------------------------------------------------------------------------------------------------------------------------------------------------------------------------------------------------------------------------------------------------------------------------------------------------------------------------------------------------------------------------------------------------------------------------------------------------------------------------------------------------------------------------------------------------------------------------------------------------|------------|-------------------|
| <b>Patient safety</b>                        | Use this code when the participant talks about using data to assess and/or minimize environmental or physical risk to patients or provision of safe care, or any explicit mention of 'safety' or 'safe' in some form as it relates to patients. Also use this code when there is any mention of patient safety metrics, this includes nursing-sensitive indicators.                                                                                                                                                                                                                                                                                                                                                           | Data Codes | Purpose of access |
| <b>Patient satisfaction/customer service</b> | Use this code when the participant talks about or implies using data to evaluate patient satisfaction, customer service, or any mention of a patient satisfaction/customer service application. Press Ganey and SHEP appear to be the most prominent but there may be others.                                                                                                                                                                                                                                                                                                                                                                                                                                                 | Data Codes | Purpose of access |
| <b>Problem-solving</b>                       | Use this code for statements related to using data to help a participant's determination of how to address or resolve an emergent issue related to any aspect of staffing.                                                                                                                                                                                                                                                                                                                                                                                                                                                                                                                                                    | Data Codes | Purpose of access |
| <b>Quality improvement</b>                   | <p>Use this code when the participant talks about or implies using data to support improvement of the quality of care delivered to patients and plans or decisions made in addressing quality issues. This includes use of data to facilitate or inform efforts made to improve staffing methodology, staffing processes, or processes relating to educating or supporting staff at any level.</p> <p>Also use this code for statements related to using or researching evidence-based practice data or models, to facilitate a participant's execution of responsibilities and/or that executed by their staff, or any explicit mention of 'evidence-based' in some form as it relates to the participant's use of data.</p> | Data Codes | Purpose of access |

|                               |                                                                                                                                                                                                                                                                                                                                                                                                                                                |                 |                   |
|-------------------------------|------------------------------------------------------------------------------------------------------------------------------------------------------------------------------------------------------------------------------------------------------------------------------------------------------------------------------------------------------------------------------------------------------------------------------------------------|-----------------|-------------------|
| <b>Quality of care</b>        | Use this code when the participant talks about using data to assess the quality of care delivered at any level, including any mention of quality metrics that aren't specifically related to patient safety.                                                                                                                                                                                                                                   | Data Codes      | Purpose of access |
| <b>Root cause analysis</b>    | Use this code when the participant talks about determining the reason for certain data values or outcomes at any level (e.g. patient, unit, staff, etc.) or any step within that process of determination.                                                                                                                                                                                                                                     | Data Codes      | Purpose of access |
| <b>Staffing justification</b> | Use this code when the participant talks about using data specifically to justify the need for staff.                                                                                                                                                                                                                                                                                                                                          | Data Codes      | Purpose of access |
| <b>Time comparison</b>        | Use this code for statements related to viewing and comparing the same type of data from different periods of time.                                                                                                                                                                                                                                                                                                                            | Data Codes      | Purpose of access |
| <b>Staffing planning</b>      | Use this code for statements related to the use or necessity of data for the participant to staff their unit(s) appropriately whether present day data, historical data, or future forecasting; or any metrics related to appropriate staffing such as nursing hours per day. This definition includes the use of data for staffing methodology, to establish or evaluate staffing targets or processes, or to determine scheduling processes. | Data Codes      | Purpose of access |
| <b>Automation</b>             | Participant notes that automated or improved automated data gathering would be useful in a dashboard.                                                                                                                                                                                                                                                                                                                                          | Dashboard Codes | Recommendations   |
| <b>Centralization</b>         | Use this code for statements related to combining data sources into one system.                                                                                                                                                                                                                                                                                                                                                                | Dashboard Codes | Recommendations   |
| <b>Connection to EMR</b>      | Instances where the participants want any dashboard they use to be connected to the EMR.                                                                                                                                                                                                                                                                                                                                                       | Dashboard Codes | Recommendations   |
| <b>Dashboard content</b>      | Participant lists the content they would like in a dashboard.                                                                                                                                                                                                                                                                                                                                                                                  | Dashboard Codes | Recommendations   |

|                               |                                                                                                                                                                                                                                                            |                 |                 |
|-------------------------------|------------------------------------------------------------------------------------------------------------------------------------------------------------------------------------------------------------------------------------------------------------|-----------------|-----------------|
| <b>Level of granularity</b>   | Level at which the participant would like dashboard data to be displayed. Possible options might include by unit/program, service/care line, facility, VISN, national, etc.                                                                                | Dashboard Codes | Recommendations |
| <b>Patient acuity</b>         | Use this code when the participant expresses a desire for patient acuity-related data on their ideal dashboard. This includes any statements related to illness severity, intensity of care necessary, or specific equipment needed for a unit's patients. | Dashboard Codes | Recommendations |
| <b>Predictive modeling</b>    | Use this code for statements related to predictive or projection models on the participant's ideal dashboard.                                                                                                                                              | Dashboard Codes | Recommendations |
| <b>Sort/filter</b>            | Use this code for statements related to sorting, filtering, or drilling through data on the participant's ideal dashboard.                                                                                                                                 | Dashboard Codes | Recommendations |
| <b>Staff demographics</b>     | Use this code for statements related to staff demographic data on the participant's ideal dashboard.                                                                                                                                                       | Dashboard Codes | Recommendations |
| <b>Staff safety metrics</b>   | Use this code for any metrics stated by the participant that can be used to gauge staff safety at any level.                                                                                                                                               | Dashboard Codes | Recommendations |
| <b>Staffing levels</b>        | Use this for statements related to the participant's ability to assess staffing levels at any organizational level. Includes vacancies and unplanned leave, such as, but not limited to, sick leave and FMLA.                                              | Dashboard Codes | Recommendations |
| <b>Update frequency</b>       | Participant expresses a preferred frequency or frequencies for a dashboard.                                                                                                                                                                                | Dashboard Codes | Recommendations |
| <b>Patient safety metrics</b> | Use this code when the participant expresses or implies a desire to have patient safety metrics on their ideal dashboard, including nursing-sensitive indicators.                                                                                          | Dashboard Codes | Recommendations |
| <b>Quality metrics</b>        | Use this code when the participant expresses or implies that they would like dashboard metrics to help evaluate quality of care.                                                                                                                           | Dashboard Codes | Recommendations |

|                                              |                                                                                                                                                                                                                                                                                                                    |                 |                  |
|----------------------------------------------|--------------------------------------------------------------------------------------------------------------------------------------------------------------------------------------------------------------------------------------------------------------------------------------------------------------------|-----------------|------------------|
| <b>Patient flow</b>                          | Use this code for statements related to patient flow metrics on the participant's ideal dashboard.                                                                                                                                                                                                                 | Dashboard Codes | Recommendations  |
| <b>Time frame</b>                            | Use this code for statements related to the time frame in which the participant would like information displayed on their ideal dashboard - typically real-time, past, or future.                                                                                                                                  | Dashboard Codes | Recommendations  |
| <b>Patient satisfaction/customer service</b> | Use this code for statements related to patient experience, patient satisfaction, or customer service relevant metrics on the participant's ideal dashboard.                                                                                                                                                       | Dashboard Codes | Recommendations  |
| <b>Advocacy</b>                              | Use this code when the participant talks about advocating for their employees or serving as a bridge between employees and leadership at any level.                                                                                                                                                                | Staffing Codes  | Responsibilities |
| <b>Budget management</b>                     | Use this code when the participant talks about budget as it relates to any aspect of staffing.                                                                                                                                                                                                                     | Staffing Codes  | Responsibilities |
| <b>Clinical specialty</b>                    | Use this code when the participant describes their clinical specialty or responsibilities that are specific to their clinical specialty.                                                                                                                                                                           | Staffing Codes  | Responsibilities |
| <b>Collaboration</b>                         | Use this code when the participant alludes to collaboration with other staff or leaders at any level and/or across disciplines for a given purpose.                                                                                                                                                                | Staffing Codes  | Responsibilities |
| <b>Ensure patient safety</b>                 | Use this code when the participant talks about minimizing risk to patients, provision of safe care, or any explicit mention of 'safety' or 'safe' in some form as it relates to patients.                                                                                                                          | Staffing Codes  | Responsibilities |
| <b>Ensure staff safety</b>                   | Use this code when the participant talks about minimizing environmental and/or physical risk through implementation of measures (i.e. actions) or training, potential consequences of staff exposure to the specified risk(s), and any explicit mention of 'safety' or 'safe' in some form as it relates to staff. | Staffing Codes  | Responsibilities |

|                               |                                                                                                                                                                                                                                                                                                                                |                |                  |
|-------------------------------|--------------------------------------------------------------------------------------------------------------------------------------------------------------------------------------------------------------------------------------------------------------------------------------------------------------------------------|----------------|------------------|
| <b>Float management</b>       | Use this code for any statements related to float assignments, float coordination between units, or ensuring that floats are available or present to work on a given unit or multiple units.                                                                                                                                   | Staffing Codes | Responsibilities |
| <b>General oversight</b>      | Use this code for statements related to oversight in a facility or service/care line, or supervision of a unit or staff, but without any further or extensive description of what the oversight/supervision entails.                                                                                                           | Staffing Codes | Responsibilities |
| <b>Manage nurse travel</b>    | Use this code for statements related to travelling to other hospital units because of a specific skill set possessed by the participant or the participant's staff, that the staff on the destination unit may not necessarily have.                                                                                           | Staffing Codes | Responsibilities |
| <b>Organizational support</b> | Use this code when the participant talks about supporting their employees through the assurance or provision of necessary resources or requested assistance in any way. Resources include sufficient staff, equipment, or any other things staff might need to effectively carry out their work.                               | Staffing Codes | Responsibilities |
| <b>Patient caseload</b>       | Use this code for statements related to patient volume on a unit or patients assigned per staff at a specific point in time or over a given time period.                                                                                                                                                                       | Staffing Codes | Responsibilities |
| <b>Patient type</b>           | Use this code when the participant mentions patients with regard to their specific health condition, equipment needed or used for the patient.                                                                                                                                                                                 | Staffing Codes | Responsibilities |
| <b>Quality management</b>     | Use this code for statements related to the development and evaluation of progress toward goals, set processes, and/or establishment of standards within a participant's unit, service line, or facility at a specific point in time or over a given time period. Includes evaluation of unit performance and quality of care. | Staffing Codes | Responsibilities |



|                                        |                                                                                                                                                                                                                                                                                                                                                                                 |                |                  |
|----------------------------------------|---------------------------------------------------------------------------------------------------------------------------------------------------------------------------------------------------------------------------------------------------------------------------------------------------------------------------------------------------------------------------------|----------------|------------------|
| <b>Planning and/or decision-making</b> | Use this code when the participants talks about planning or making staffing decisions in any capacity and at any organizational level, in situations which do not present a specific problem, crisis, or issue.                                                                                                                                                                 | Staffing Codes | Responsibilities |
| <b>Practice management</b>             | Use this code when the participant talks about ensuring that responsibilities are appropriately delegated to staff depending on their role, education, or experience, and that these responsibilities are efficiently and effectively carried out by their staff. Responsibilities are not limited to day-to-day tasks, but can also include practice improvement, policy, etc. | Staffing Codes | Responsibilities |
| <b>Problem-solving</b>                 | Use this code when the participant alludes to or give examples relating to situations in which they must determine how to address or resolve an issue related to any aspect of staffing.                                                                                                                                                                                        | Staffing Codes | Responsibilities |
| <b>Scheduling</b>                      | Use this code when the participant talks about assigning staff to shifts, including the act of filling vacancies, assigning staff overtime, or an explicit mention of 'scheduling' in some form.                                                                                                                                                                                | Staffing Codes | Responsibilities |
| <b>Shift coverage</b>                  | Use this code when the participant talks about going into a shift to perform tasks or support their staff, in either a supervisory, direct, or indirect care role.                                                                                                                                                                                                              | Staffing Codes | Responsibilities |
| <b>Staff education and competency</b>  | Use this code for statements related to staff training, clinical education, or assessing or verifying staff competencies, that allows staff to carry out their duties effectively. Code also any statements with an explicit mention of staff 'education' or 'competency' in some form.                                                                                         | Staffing Codes | Responsibilities |
| <b>Staff engagement</b>                | Use this code when the participant talks about involving and supporting their staff, applied to various circumstances. This includes, but is not limited to communicating with staff to keep them informed or consider their thoughts on issues or decisions, acting as the bridge between staff and leadership at                                                              | Staffing Codes | Responsibilities |

|                             |                                                                                                                                                                                                                                                                                                                                                                   |                |                  |
|-----------------------------|-------------------------------------------------------------------------------------------------------------------------------------------------------------------------------------------------------------------------------------------------------------------------------------------------------------------------------------------------------------------|----------------|------------------|
|                             | any level, providing necessary resources for staff, and conducting staff surveys.                                                                                                                                                                                                                                                                                 |                |                  |
| <b>Staff recruitment</b>    | Use this code for statements related to communication with HR for staff, actively seeking to employ staff at any organizational level, or an explicit mention of 'recruitment' in some form.                                                                                                                                                                      | Staffing Codes | Responsibilities |
| <b>Staffing adequacy</b>    | Use this code for statements related to targeting or meeting minimums for staffing at any role type, filling vacancies for the purpose of having sufficient staffing, ensuring availability of staff, coordinating staff coverage, or an explicit mention of 'adequate staffing' in some form, either at a specific point in time or over a given period of time. | Staffing Codes | Responsibilities |
| <b>Personnel evaluation</b> | Use this code for statements related to hiring or firing of staff, discipline of staff, or formal evaluations of staff.                                                                                                                                                                                                                                           | Staffing Codes | Responsibilities |
| <b>Data Sources</b>         | Use this code whenever participants discuss the particular sources (SAIL, IPEC, ONS, etc.) from which they gather the data they use for their jobs. This also includes directly obtaining data from individuals, units, facilities, etc.                                                                                                                          | Data Codes     | Sources          |
