# Supplementary material
Source: PubMed Central journal article supplement (PMC10350463)
Supplement: NIHMS1854799-supplement-Supplemental_Data_File___doc___tif__pdf__etc___3.pdf [file NIHMS1854799-supplement-Supplemental_Data_File___doc___tif__pdf__etc___3.pdf]

### Participant Roles and Organizational Levels

| Role (# Participants, If More Than 1)                                                | Unit Type<br>(If Applicable) | Facility Complexity<br>(If Applicable) |
|--------------------------------------------------------------------------------------|------------------------------|----------------------------------------|
| <b>National (<i>Office Name Used in Lieu of Role Title, For Confidentiality</i>)</b> |                              |                                        |
| Office of Nursing Informatics, Office of Nursing Services (2 participants)           |                              |                                        |
| Office of Nursing Services (3 participants)                                          |                              |                                        |
| Office of Productivity, Efficiency, and Staffing                                     |                              |                                        |
| <b>VISN</b>                                                                          |                              |                                        |
| Associate Chief Nurse                                                                |                              |                                        |
| Chief Nursing Officer                                                                |                              |                                        |
| Deputy Chief Medical Officer                                                         |                              |                                        |
| High Reliability Lead                                                                |                              |                                        |
| Nurse Informatics/Quality Manager, Staffing Methodology Consultant                   |                              |                                        |
| Patient Safety Officer                                                               |                              |                                        |
| <b>Facility</b>                                                                      |                              |                                        |
| Associate Chief Nurse Executive                                                      |                              | 1a-High Complexity                     |
| Associate Director of Patient Care Services                                          |                              | 1b-High Complexity                     |
| Associate Director of Patient Care Services                                          |                              | 1c-High Complexity                     |
| Associate Director of Patient Care Services/Nurse Executive                          |                              | 2-Medium Complexity                    |
| Chief Nursing Officer                                                                |                              | 1a-High Complexity                     |
| Deputy Nurse Executive                                                               |                              | 2-Medium Complexity                    |
| <b>Service</b>                                                                       |                              |                                        |
| Acting Associate Chief Nurse                                                         |                              | 1c-High Complexity                     |
| Associate Chief Nurse of Inpatient Services                                          |                              | 2-Medium Complexity                    |
| Chief Nurse-Acute Care                                                               |                              | 1a-High Complexity                     |
| Medical Care Line Inpatient Nurse Executive                                          |                              | 1a-High Complexity                     |
| <b>Unit</b>                                                                          |                              |                                        |
| Clinical Nurse Manager                                                               | ICU/Med-Surg                 | 1c-High Complexity                     |
| Nurse Manager                                                                        | Medical                      | 1a-High Complexity                     |
| Nurse Manager                                                                        | Med-Surg                     | 1b-High Complexity                     |
| Nurse Manager                                                                        | ICU                          | 1a-High Complexity                     |
| ICU Nurse Manager                                                                    | ICU                          | 2-Medium Complexity                    |
